# Supplementary material
Source: publisher figshare collection journal article supplement (https://acs.figshare.com/ndownloader/files/4548748)
Supplement: Supplementary file 1 [file 4548748]

## **An Isolable NHC Supported Silanone**

Yun Xiong, Shenglai Yao, Matthias Driess \*

*Institute of Chemistry: Metalorganics and Inorganic Materials, Technische Universität Berlin, Strasse  
des 17. Juni 135, Sekr. C2, D-10623 Berlin, Germany*

## ***Supporting Information***

## Experimental Section

### General Considerations.

All experiments and manipulations were carried out under dry oxygen-free nitrogen using standard Schlenk techniques or in an MBraun inert atmosphere drybox containing an atmosphere of purified nitrogen. Solvents were dried by standard methods and freshly distilled prior to use. The starting  $\text{LSi}:(\mathbf{1})^1$   $\{\text{L} = \text{CH}[(\text{C}=\text{CH}_2)\text{CMe}][\text{N}(\text{Ar})]_2\}$ ,  $\text{Ar} = 2,6\text{-}i\text{Pr}_2\text{C}_6\text{H}_3\}$  and 1,3,4,5-tetramethylimidazol-2-ylidene  $^2$  were prepared according to literature procedures.  $^1\text{H}$ ,  $^{13}\text{C}$ ,  $^{29}\text{Si}$ , NMR spectra were recorded on Bruker ARX200 and AV 400 Spectrometers.

**Single-Crystal X-ray Structure Determinations:** Crystals were each mounted on a glass capillary in perfluorinated oil and measured in a cold  $\text{N}_2$  flow. The data of compounds **2** and **3** were collected on an Oxford Diffraction Xcalibur S Sapphire at 150 K (Mo- $\text{K}\alpha$  radiation,  $\lambda = 0.71073 \text{ \AA}$ ). The structures were solved by direct methods and refined on  $F^2$  with the SHELX-97  $^3$  software package. The positions of the H atoms were calculated and considered isotropically according to a riding model.

**Compound 2:** 1,3,4,5-tetramethylimidazol-2-ylidene (0.22g, 1.77 mmol) in toluene (10mL) was added to a solution of silylene **1** (0.79 g, 1.77 mmol) in toluene (10 mL) at  $-60^\circ\text{C}$ . After 30 min the reaction was completed and the solution was concentrated to about 5 mL and cooled at  $-20^\circ\text{C}$ . The product **2** crystallized as yellow crystals (0.87 g, 1.52 mmol, 86 %). M.p.  $127^\circ\text{C}$  (decomp.);  $^1\text{H}$  NMR (200.13 MHz,  $[\text{D}_6]\text{benzene}$ ,  $25^\circ\text{C}$ ):  $\delta = 0.36$  (d,  $^3J(\text{H,H}) = 7.0 \text{ Hz}$ , 6 H;  $\text{CHMe}_2$ ), 1.06 (s, 3 H;  $\text{C}_2\text{Me}_2$ ), 1.12 (d,  $^3J(\text{H,H}) = 7.0 \text{ Hz}$ , 3 H;  $\text{CHMe}_2$ ), 1.41 (s, 3 H,  $\text{C}_2\text{Me}_2$ ), 1.45 (d,  $^3J(\text{H,H}) = 7.0 \text{ Hz}$ , 3 H;  $\text{CHMe}_2$ ), 1.49 (d,  $^3J(\text{H,H}) = 7.0 \text{ Hz}$ , 3 H;  $\text{CHMe}_2$ ), 1.61-1.63 ( $3 \times \text{d}$ ,  $^3J(\text{H,H}) = 7.0 \text{ Hz}$ , 9 H;  $\text{CHMe}_2$ ), 1.65 (s, 3 H;  $\text{NCMe}$ ), 2.93 (m, 2 H;  $\text{CHMe}_2$ ), 3.16 (s, 3 H;  $\text{NMe}$ ), 3.29 (s, 1 H;  $\text{NCCH}_2$ ), 3.79 (s, 3 H,  $\text{NMe}$ ), 3.96 (s, 1 H;  $\text{NCCH}_2$ ), 4.27 (m, 2 H;  $\text{CHMe}_2$ ), 5.50 (s, 1 H;  $\gamma\text{-CH}$ ), 7.04 – 7.40 ppm (m, br, 6 H; 2,6- $i\text{Pr}_2\text{C}_6\text{H}_3$ );  $^{13}\text{C}\{^1\text{H}\}$  NMR (100.61 MHz,  $[\text{D}_6]\text{benzene}$ ,  $25^\circ\text{C}$ ):  $\delta = 7.8, 7.9$  ( $\text{C}_2\text{Me}_2$ ), 23.5, 23.9, 24.2, 24.3, 24.8, 24.9, 25.8, 26.0, 26.1, 27.5, 28.1, 29.2, 29.4 ( $\text{NCMe}$ ,  $\text{CHMe}_2$ ), 32.5, 34.2 ( $\text{NMe}$ ), 81.2 ( $\text{NCCH}_2$ ), 103.4 ( $\gamma\text{-C}$ ), 123.1, 123.6, 124.7, 124.8, 125.1, 125.4, 126.1, 126.4, 143.3, 144.0, 144.3, 147.7, 148.4, 148.7, 149.3, 151.5 ( $\text{NCMe}$ ,  $\text{NCCH}_2$ , 2,6- $i\text{Pr}_2\text{C}_6\text{H}_3$ ,  $\text{C}_2\text{Me}_2$ ), 169.4 ppm ( $\text{SiC}$ );  $^{29}\text{Si}\{^1\text{H}\}$  NMR (79.49 MHz,  $[\text{D}_6]\text{benzene}$ ,  $25^\circ\text{C}$ ):  $\delta = -12.0$  ppm (s); EI-MS:  $m/z$  (%): 568.42 (12  $[\text{M}^+]$ ), 553.38 (21  $[\text{M-Me}]^+$ ), 525.32 (18  $[\text{M-}i\text{Pr}]^+$ ), 418.35 (43  $[\text{L}]^+$ ), 403.32 (100  $[\text{L-Me}]^+$ ). Elemental analysis calcd (%) for  $\text{C}_{36}\text{H}_{52}\text{N}_4\text{Si}$ : C 76.0, H 9.2, N

9.9, found: C 76.4, H 9.4, N 9.8. IR (KBr,  $\text{cm}^{-1}$ ): 420 (W), 464 (W), 490 (w), 738 (w), 759 (m), 787 (w), 804 (m), 851 (w), 880 (w), 930 (w), 983 (w), 1045 (m), 1058 (m), 1078 (m), 1105 (m), 1136 (w), 1177 (w), 1197 (w), 1210 (w), 1254 (m), 1357 (m), 1382 (s), 1440 (s), 1466 (s), 1551 (m), 1624 (s), 2052 (w), 2867 (m), 2927 (m), 2963 (s), 3055 (w), 3105 (w).

**Compound 3:** A solution of **2** (0.45 g, 0.79 mmol) in toluene (20 ml) was cooled to  $-78^{\circ}\text{C}$ . The  $\text{N}_2$  atmosphere in the flask was exchanged to  $\text{N}_2\text{O}$ . In the course of stirring and warming to room temperature a colorless precipitate formed. Volatiles were removed in *vacuo* and the residue was washed with hexane to afford compound **3** as a white powder (0.43 g, 0.74 mmol, 94 %). X-ray diffraction-quality crystals were obtained by recrystallization from toluene/dichloromethane (v/v: 5:1) at  $-20^{\circ}\text{C}$ . M.p.  $239\text{--}241^{\circ}\text{C}$ .  $^1\text{H}$  NMR (200.13 MHz,  $[\text{D}_2]$ dichloromethane,  $25^{\circ}\text{C}$ ):  $\delta$  = 0.32 (d,  $^3J(\text{H,H})$  = 6.9 Hz, 3 H;  $\text{CHMe}_2$ ), 0.42 (d,  $^3J(\text{H,H})$  = 6.9 Hz, 3 H;  $\text{CHMe}_2$ ), 1.09 (d,  $^3J(\text{H,H})$  = 6.9 Hz, 3 H;  $\text{CHMe}_2$ ), 1.11 (d,  $^3J(\text{H,H})$  = 6.9 Hz, 3 H;  $\text{CHMe}_2$ ), 1.17 (d,  $^3J(\text{H,H})$  = 6.9 Hz, 3 H;  $\text{CHMe}_2$ ), 1.22 (d,  $^3J(\text{H,H})$  = 6.9 Hz, 9 H;  $\text{CHMe}_2$ ), 1.34 (d,  $^3J(\text{H,H})$  = 6.9 Hz, 3 H;  $\text{CHMe}_2$ ), 1.37 (d,  $^3J(\text{H,H})$  = 6.9 Hz, 3 H;  $\text{CHMe}_2$ ), 1.50 (s, 3 H;  $\text{NCMe}$ ), 2.06 (s, 3 H,  $\text{C}_2\text{Me}_2$ ), 2.26 (s, 3 H;  $\text{C}_2\text{Me}_2$ ), 2.62 (sept,  $^3J(\text{H,H})$  = 6.9 Hz, 1 H;  $\text{CHMe}_2$ ), 2.71 (sept,  $^3J(\text{H,H})$  = 6.9 Hz, 1 H;  $\text{CHMe}_2$ ), 2.80 (s, 1 H;  $\text{NCCH}_2$ ), 3.59 (s, 1 H;  $\text{NCCH}_2$ ), 3.81 (sept,  $^3J(\text{H,H})$  = 6.9 Hz, 1 H;  $\text{CHMe}_2$ ), 3.83 (sept,  $^3J(\text{H,H})$  = 6.9 Hz, 1 H;  $\text{CHMe}_2$ ), 3.99 (s, 3 H;  $\text{NMe}$ ), 4.17 (s, 3 H,  $\text{NMe}$ ), 5.532 (s, 1 H;  $\gamma\text{-CH}$ ), 6.95 – 7.25 ppm (m, br, 6 H; 2,6- $i\text{Pr}_2\text{C}_6\text{H}_3$ );  $^{13}\text{C}\{^1\text{H}\}$  NMR (100.61 MHz,  $[\text{D}_2]$ dichloromethane,  $25^{\circ}\text{C}$ ):  $\delta$  = 8.9, 9.0 ( $\text{C}_2\text{Me}_2$ ), 22.6 – 29.1 ( $\text{NCMe}$ ,  $\text{CHMe}_2$ ), 34.20, 34.22 ( $\text{NMe}$ ), 84.3 ( $\text{NCCH}_2$ ), 103.5 ( $\gamma\text{-C}$ ), 123.4 – 154.7 ( $\text{NCMe}$ ,  $\text{NCCH}_2$ , 2,6- $i\text{Pr}_2\text{C}_6\text{H}_3$ ,  $\text{C}_2\text{Me}_2$ ,  $\text{SiC}$ );  $^{29}\text{Si}\{^1\text{H}\}$  NMR (79.49 MHz,  $[\text{D}_6]$ benzene,  $25^{\circ}\text{C}$ ):  $\delta$  =  $-74.2$  ppm (s); EI-MS:  $m/z$  (%): 584.39 (12,  $[\text{M}]^+$ ), 569.39 (29,  $[\text{M-Me}]^+$ ), 541.34 (100,  $[\text{M-}^i\text{Pr}]^+$ ). Elemental analysis (%): calcd for  $\text{C}_{36}\text{H}_{52}\text{N}_4\text{SiO}$ : C, 73.9; H, 9.0; N, 9.6. Found C, 74.4; H, 9.3; N, 9.4. IR (KBr,  $\text{cm}^{-1}$ ): 407 (W), 462 (m), 475 (m), 490 (m), 510 (w), 540 (w), 564 (m), 584 (w), 600 (w), 737 (w), 760 (m), 805 (m), 851 (m), 911 (w), 923 (m), 938 (w), 980 (w), 1046 (m), 1057 (m), 1134 (s), 1178 (m), 1195 (m), 1252 (m), 1309 (m), 1355 (s), 1380 (s), 1407 (w), 1442 (m), 1466 (m), 1523 (w), 1583 (w), 1639 (s), 2866 (m), 2927 (m), 2966 (s), 3056 (w), 3109 (w).

### Crystallographic data for **2**

Empirical formula

$\text{C}_{36}\text{H}_{52}\text{N}_4\text{Si}$

|                                   |                                             |                              |
|-----------------------------------|---------------------------------------------|------------------------------|
| Formula weight                    | 568.91                                      |                              |
| Temperature                       | 150(2) K                                    |                              |
| Wavelength                        | 0.71073 Å                                   |                              |
| Crystal system                    | Monoclinic                                  |                              |
| Space group                       | P21/n                                       |                              |
| Unit cell dimensions              | a = 12.5248(7) Å                            | $\alpha = 90^\circ$ .        |
|                                   | b = 16.5902(7) Å                            | $\beta = 105.545(5)^\circ$ . |
|                                   | c = 17.3318(8) Å                            | $\gamma = 90^\circ$ .        |
| Volume                            | 3469.6(3) Å <sup>3</sup>                    |                              |
| Z                                 | 4                                           |                              |
| Density (calculated)              | 1.089 Mg/m <sup>3</sup>                     |                              |
| Absorption coefficient            | 0.096 mm <sup>-1</sup>                      |                              |
| F(000)                            | 1240                                        |                              |
| Crystal size                      | 0.06 x 0.05 x 0.04 mm <sup>3</sup>          |                              |
| Theta range for data collection   | 2.98 to 25.00°.                             |                              |
| Index ranges                      | -14 ≤ h ≤ 14, -19 ≤ k ≤ 19, -20 ≤ l ≤ 20    |                              |
| Reflections collected             | 24365                                       |                              |
| Independent reflections           | 6086 [R(int) = 0.1483]                      |                              |
| Completeness to theta = 25.00°    | 99.7 %                                      |                              |
| Absorption correction             | None                                        |                              |
| Refinement method                 | Full-matrix least-squares on F <sup>2</sup> |                              |
| Data / restraints / parameters    | 6086 / 18 / 383                             |                              |
| Goodness-of-fit on F <sup>2</sup> | 0.936                                       |                              |
| Final R indices [I > 2σ(I)]       | R1 = 0.0699, wR2 = 0.0700                   |                              |
| R indices (all data)              | R1 = 0.1972, wR2 = 0.0939                   |                              |
| Largest diff. peak and hole       | 0.216 and -0.185 e.Å <sup>-3</sup>          |                              |

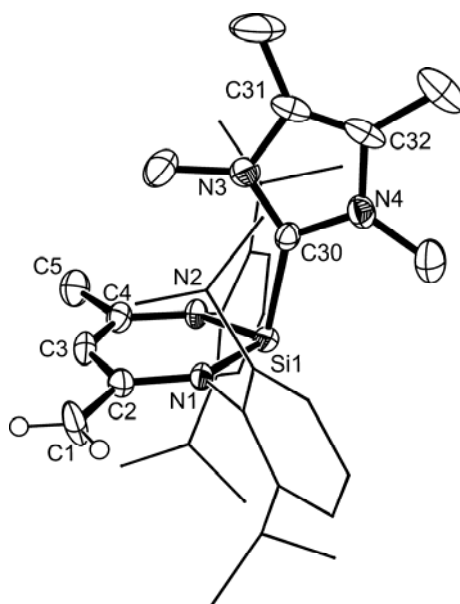

**Figure 1.** Molecular structure of compound **2**. Thermal ellipsoids are drawn at 50% probability level. Hydrogen atoms (except for those at C1) are omitted for clarity.

Table 1. Selected interatomic distances and angles of compound **2**

| Interatomic distances (pm) |          | Angles(°)  |          |
|----------------------------|----------|------------|----------|
| Si1-N2                     | 1.802(3) | N2-Si1-N1  | 97.7(1)  |
| Si1-N1                     | 1.805(3) | N2-Si1-C30 | 100.4(1) |
| Si1-C30                    | 2.016(3) | N1-Si1-C30 | 97.8(1)  |
| N1-C2                      | 1.392(3) | C2-N1-Si1  | 128.4(2) |
| N2-C4                      | 1.401(4) | C4-N2-Si1  | 125.5(2) |
| N3-C30                     | 1.358(4) | C30-N3-C31 | 111.8(3) |
| N3-C31                     | 1.389(4) | C30-N4-C32 | 111.9(3) |
| N4-C30                     | 1.359(3) | N1-C2-C3   | 118.1(3) |
| N4-C32                     | 1.385(4) | C4-C3-C2   | 127.7(3) |
| C1-C2                      | 1.383(4) | C3-C4-N2   | 122.0(3) |
| C2-C3                      | 1.427(4) | N3-C30-N4  | 102.9(3) |
| C3-C4                      | 1.376(4) | N3-C30-Si1 | 134.6(3) |
| C4-C5                      | 1.470(4) | N4-C30-Si1 | 121.7(3) |
| C31-C32                    | 1.329(4) | C32-C31-N3 | 106.6(3) |
|                            |          | C31-C32-N4 | 106.8(3) |

### Crystallographic data for **3**

Empirical formula

C<sub>46.50</sub> H<sub>64</sub> N<sub>4</sub> O Si

|                                   |                                             |                              |
|-----------------------------------|---------------------------------------------|------------------------------|
| Formula weight                    | 723.11                                      |                              |
| Temperature                       | 150(2) K                                    |                              |
| Wavelength                        | 0.71073 Å                                   |                              |
| Crystal system                    | Monoclinic                                  |                              |
| Space group                       | C2/c                                        |                              |
| Unit cell dimensions              | a = 24.6511(9) Å                            | $\alpha = 90^\circ$ .        |
|                                   | b = 15.6914(4) Å                            | $\beta = 114.280(2)^\circ$ . |
|                                   | c = 24.5387(8) Å                            | $\gamma = 90^\circ$ .        |
| Volume                            | 8652.2(5) Å <sup>3</sup>                    |                              |
| Z                                 | 8                                           |                              |
| Density (calculated)              | 1.110 Mg/m <sup>3</sup>                     |                              |
| Absorption coefficient            | 0.092 mm <sup>-1</sup>                      |                              |
| F(000)                            | 3144                                        |                              |
| Crystal size                      | 0.48 x 0.42 x 0.31 mm <sup>3</sup>          |                              |
| Theta range for data collection   | 3.08 to 25.00°.                             |                              |
| Index ranges                      | -28 ≤ h ≤ 29, -17 ≤ k ≤ 18, -29 ≤ l ≤ 29    |                              |
| Reflections collected             | 25696                                       |                              |
| Independent reflections           | 7611 [R(int) = 0.0303]                      |                              |
| Completeness to theta = 25.00°    | 99.7 %                                      |                              |
| Absorption correction             | Semi-empirical from equivalents             |                              |
| Max. and min. transmission        | 1.00000 and 0.82001                         |                              |
| Refinement method                 | Full-matrix least-squares on F <sup>2</sup> |                              |
| Data / restraints / parameters    | 7611 / 185 / 551                            |                              |
| Goodness-of-fit on F <sup>2</sup> | 1.041                                       |                              |
| Final R indices [I > 2σ(I)]       | R1 = 0.0490, wR2 = 0.1170                   |                              |
| R indices (all data)              | R1 = 0.0760, wR2 = 0.1271                   |                              |
| Largest diff. peak and hole       | 0.521 and -0.399 e.Å <sup>-3</sup>          |                              |

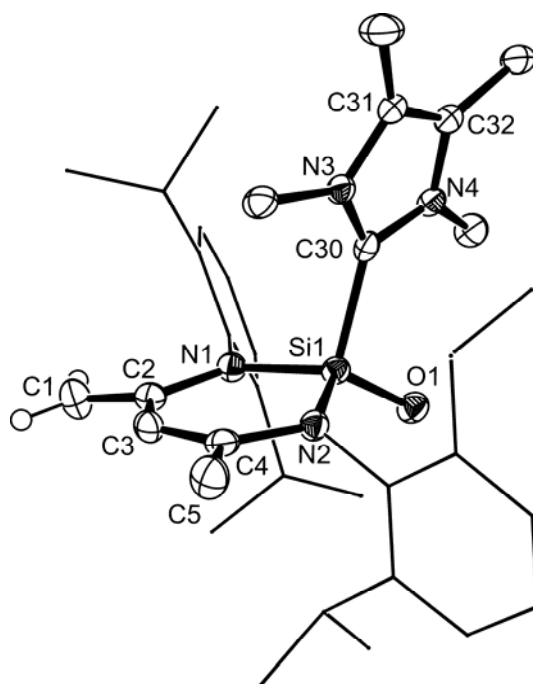

**Figure 2.** Molecular structure of compound **3**. Thermal ellipsoids are drawn at 50% probability level. Hydrogen atoms (except those at C1) are omitted for clarity.

Table 2 Selected interatomic distances and angles of compound **3**

| Interatomic distances (pm) |          | Angles (°) |           |
|----------------------------|----------|------------|-----------|
| Si1-O1                     | 1.541(2) | O1-Si1-N1  | 118.81(8) |
| Si1-N1                     | 1.745(2) | O1-Si1-N2  | 115.21(8) |
| Si1-N2                     | 1.750(2) | N1-Si1-N2  | 102.42(8) |
| Si1-C30                    | 1.930(2) | O1-Si1-C30 | 106.09(8) |
| N1-C2                      | 1.412(3) | N1-Si1-C30 | 105.61(9) |
| N2-C4                      | 1.411(2) | N2-Si1-C30 | 108.00(9) |
| N3-C30                     | 1.354(3) | C2-N1-Si1  | 125.8(2)  |
| N3-C31                     | 1.386(3) | C6-N1-Si1  | 117.1(1)  |
| N4-C30                     | 1.357(3) | C4-N2-Si1  | 122.8(2)  |
| N4-C32                     | 1.381(3) | N1-C2-C3   | 117.1(2)  |
| C1-C2                      | 1.355(3) | C4-C3-C2   | 128.5(2)  |
| C2-C3                      | 1.451(3) | C3-C4-N2   | 122.0(2)  |
| C3-C4                      | 1.347(3) | N3-C30-N4  | 104.5(2)  |
| C31-C32                    | 1.351(3) |            |           |

## References

<sup>1</sup> Driess, M.; Yao, S.; Brym, M.; van Wüllen, C.; Lentz, D. *J. Am. Chem. Soc.* **2006**, *128*, 9628.

<sup>2</sup> Kuhn, N.; Kratz, T. *Synthesis* **1993**, 561.

<sup>3</sup> G. M. Sheldrick, *SHELX-97 Program for Crystal Structure Determination*, Universität Göttingen (Germany) **1997**.
